# Supplementary material
Source: MDPI journal article supplement (https://www.mdpi.com/1999-4907/14/12/2329)
Supplement: s1 [file s1]

Supplementary Materials S1: Results of ANOVA for Different Road Types and Landscape Perception Restorativeness

| Type (mean ± SD) |                      |                      |                      |                      |                    |                    |                    |                    |                    |                    |                    |                    | F       | p       |
|------------------|----------------------|----------------------|----------------------|----------------------|--------------------|--------------------|--------------------|--------------------|--------------------|--------------------|--------------------|--------------------|---------|---------|
|                  | Main road<br>1(n=15) | Main road<br>2(n=15) | Main road<br>3(n=15) | Main road4<br>(n=15) | By-pass<br>1(n=15) | By-pass<br>2(n=15) | By-pass<br>3(n=15) | By-pass<br>4(n=15) | Pathway1<br>(n=15) | Pathway2<br>(n=15) | Pathway3<br>(n=15) | Pathway4<br>(n=15) |         |         |
| fascination      | 5.13±0.79            | 5.47±0.58            | 5.00±0.80            | 6.33±0.49            | 3.73±0.82          | 5.60±0.60          | 5.10±0.85          | 5.27±0.37          | 6.10±0.47          | 5.70±0.62          | 4.57±0.92          | 4.63±0.61          | 16.156  | 0.000** |
| being away       | 5.27±0.78            | 5.47±0.58            | 4.70±0.56            | 5.90±0.66            | 3.30±0.73          | 5.03±0.61          | 4.27±0.59          | 4.97±0.92          | 5.80±0.53          | 5.50±0.63          | 4.17±1.05          | 4.33±0.86          | 16.933  | 0.000** |
| compatibility    | 4.93±0.94            | 4.80±0.46            | 4.50±0.89            | 5.60±0.83            | 3.47±0.67          | 4.73±0.68          | 4.07±0.96          | 5.10±0.76          | 5.13±0.69          | 5.10±0.63          | 3.73±1.12          | 3.73±0.70          | 10.830  | 0.000** |
| extent           | 4.53±0.79            | 4.97±0.69            | 4.27±0.70            | 5.87±0.72            | 3.57±0.94          | 4.03±0.81          | 3.90±0.91          | 4.90±0.76          | 5.03±0.83          | 5.07±0.70          | 3.17±0.92          | 3.77±0.80          | 13.941  | 0.000** |
| PRS              | 4.97±0.05            | 5.18±0.06            | 4.62±0.10            | 5.93±0.34            | 3.52±0.27          | 4.85±0.05          | 4.34±0.08          | 5.06±0.07          | 5.52±0.08          | 5.35±0.06          | 3.91±0.09          | 4.12±0.09          | 358.502 | 0.000** |

\* p<0.05 \*\* p<0.01

Supplementary Materials S2: Results of ANOVA for Different Road Types of Soundscape

| Type (mean ± SD) |                      |                      |                      |                       |                    |                    |                    |                    |                    |                    |                    |                    | F     | p       |
|------------------|----------------------|----------------------|----------------------|-----------------------|--------------------|--------------------|--------------------|--------------------|--------------------|--------------------|--------------------|--------------------|-------|---------|
|                  | Main road<br>1(n=15) | Main road<br>2(n=15) | Main road<br>3(n=15) | Main road<br>4 (n=15) | By-pass<br>1(n=15) | By-pass<br>2(n=15) | By-pass<br>3(n=15) | By-pass<br>4(n=15) | Pathway1<br>(n=15) | Pathway2<br>(n=15) | Pathway3<br>(n=15) | Pathway4<br>(n=15) |       |         |
| tranquility      | 5.02±0.63            | 5.43±0.70            | 5.15±0.84            | 5.52±0.88             | 4.17±0.57          | 5.20±0.79          | 4.88±0.92          | 5.58±0.65          | 5.35±1.03          | 5.25±0.75          | 4.53±0.86          | 4.87±0.67          | 4.219 | 0.000** |
| pleasantness     | 4.95±0.61            | 4.95±0.76            | 4.92±0.95            | 4.80±0.93             | 3.87±0.89          | 4.52±0.82          | 4.58±0.68          | 5.50±0.79          | 5.28±0.65          | 5.05±0.98          | 4.37±1.12          | 4.62±0.67          | 4.048 | 0.000** |

\* p<0.05 \*\* p<0.01

Supplementary Materials S3: Results of ANOVA for Different Road Types and Soundscape Restorativeness

| Type (mean ± SD) |                      |                      |                      |                      |                    |                    |                    |                    |                    |                    |                    |                    | F      | p      |
|------------------|----------------------|----------------------|----------------------|----------------------|--------------------|--------------------|--------------------|--------------------|--------------------|--------------------|--------------------|--------------------|--------|--------|
|                  | Main road<br>1(n=15) | Main road<br>2(n=15) | Main road<br>3(n=15) | Main road4<br>(n=15) | By-pass<br>1(n=15) | By-pass<br>2(n=15) | By-pass<br>3(n=15) | By-pass<br>4(n=15) | Pathway1<br>(n=15) | Pathway2<br>(n=15) | Pathway3<br>(n=15) | Pathway4<br>(n=15) |        |        |
| fascination      | 5.09±0.4             | 5.52±0.5             | 4.53±0.8             | 6.65±0.6             | 3.24±1.0           | 4.85±0.8           | 4.31±0.86          | 5.60±0.64          | 6.22±0.47          | 6.00±0.55          | 3.47±0.89          | 4.44±0.61          | 32.682 | 0.000* |
| being away       | 4.88±0.5             | 5.20±0.2             | 4.58±0.3             | 4.62±0.4             | 3.32±0.7           | 4.88±0.6           | 4.47±0.41          | 5.02±0.64          | 5.68±0.39          | 5.32±0.55          | 3.95±0.76          | 4.25±0.46          | 30.078 | 0.000* |
| compatibility    | 4.71±0.0             | 5.09±0.8             | 4.44±0.3             | 6.57±0.6             | 4.40±0.8           | 4.33±0.6           | 4.60±0.74          | 4.67±0.62          | 5.69±0.88          | 5.67±0.72          | 3.80±0.86          | 4.18±0.95          | 11.488 | 0.000* |

Supplementary Materials S3: Results of ANOVA for Different Road Types and Soundscape Restorativeness

|        | Type (mean ± SD)  |                   |                   |                   |                 |                 |                 |                 |                |                |                |                | F       | p      |
|--------|-------------------|-------------------|-------------------|-------------------|-----------------|-----------------|-----------------|-----------------|----------------|----------------|----------------|----------------|---------|--------|
|        | Main road 1(n=15) | Main road 2(n=15) | Main road 3(n=15) | Main road4 (n=15) | By-pass 1(n=15) | By-pass 2(n=15) | By-pass 3(n=15) | By-pass 4(n=15) | Pathway1(n=15) | Pathway2(n=15) | Pathway3(n=15) | Pathway4(n=15) |         |        |
| extent | 5.20±0.65         | 5.56±0.64         | 4.40±0.66         | 6.36±0.53         | 3.31±0.95       | 5.00±1.11       | 4.65±0.92       | 5.20±0.89       | 5.76±0.78      | 5.16±0.78      | 4.60±0.99      | 5.00±0.65      | 13.121  | 0.000* |
|        | 8                 | 0                 | 3                 | 4                 | 1               | 3               |                 |                 |                |                |                |                |         | *      |
| PRSS   | 4.97±0.15         | 5.32±0.04         | 4.63±0.16         | 6.23±0.23         | 3.57±0.34       | 4.77±0.11       | 4.51±0.12       | 5.12±0.11       | 5.84±0.14      | 5.54±0.17      | 3.95±0.33      | 4.47±0.16      | 245.700 | 0.000* |
|        | 4                 | 7                 | 7                 | 4                 | 1               | 0               |                 |                 |                |                |                |                | 3       | *      |

\* p<0.05 \*\* p<0.01
